# Supplementary material for: Adherence to Mediterranean and low-fat diets among heart and lung transplant recipients: a randomized feasibility study
Source: PubMed Central journal article supplement (PMC5813407; doi:10.1186/s12937-018-0337-y), 2018-02-14
Supplement: 12937_2018_337_MOESM1_ESM.pdf [file 12937_2018_337_MOESM1_ESM.pdf]

**Supplemental Table 1: AMEND-IT 14-point Mediterranean dietary adherence questionnaire<sup>1</sup>**

| <b>Dietary habit/ consumption frequency</b>                                                                                                                                                           | <b>Response for 1 point<sup>2</sup></b>        |
|-------------------------------------------------------------------------------------------------------------------------------------------------------------------------------------------------------|------------------------------------------------|
| 1. Do you use extra virgin olive oil as main culinary/cooking fat/oil?                                                                                                                                | Yes                                            |
| 2. How much extra virgin olive oil do you eat in a given day (including oil used for cooking, salads, out-of-home meals etc.)?                                                                        | ≥ 4 table spoons                               |
| 3. How many vegetable servings do you eat per day? (1 serving = 200 g; side dish as a half serving)                                                                                                   | 2 or more (at least 1 serving raw or as salad) |
| 4. How many fruit units (including natural fruit juices) do you eat per day?                                                                                                                          | ≥ 3                                            |
| 5. How many servings of red meat, beef-burger or meat products (ham, sausage, bacon etc.) do you eat per week?                                                                                        | < 1                                            |
| 6. How many servings of butter, margarine or cream do you eat per day? (1 serving = 12 g or 1 tablespoon)                                                                                             | < 1                                            |
| 7. How many sweetened and/or carbonated beverages do you drink per day?                                                                                                                               | < 1                                            |
| 8. How much red wine do you drink per week?                                                                                                                                                           | ≥ 7 glasses                                    |
| 9. How many servings of legumes/pulses do you eat per week? (1 serving = 150 g or ½ cup in dry form)                                                                                                  | ≥ 3                                            |
| 10. How many servings of fish or shellfish do you eat per week? (1 serving 100–150 g of fish [size of deck of cards] or 4–5 units or 200 g of shellfish)                                              | ≥ 3                                            |
| 11. How many times per week do you eat desserts or pastries (not homemade), such as biscuits, cookies, cakes, custard etc.?                                                                           | < 3                                            |
| 12. How many servings of unsalted nuts (including peanuts) do you eat per week? (1 serving = 30 g or 1 small handful)                                                                                 | ≥ 3                                            |
| 13. Do you prefer to eat chicken, turkey or lean game instead of pork, beef-burger, sausage or bacon?                                                                                                 | Yes                                            |
| 14. How many times per week do you eat a self-made sauce (sofrito) prepared with tomato, garlic, onion or leeks - simmered in olive oil. Used as a garnish to season vegetable, pasta or rice dishes? | ≥ 2                                            |

<sup>1</sup> Adapted from Estruch et al.

<sup>2</sup> Criteria to score=1; otherwise score=0.

### Reference

1. Estruch R, Ros E, Salas-Salvadó J, Covas M-I, Corella D, Arós F, Gómez-Gracia E, Ruiz-Gutiérrez V, Fiol M, Lapetra J, et al: Primary Prevention of Cardiovascular Disease with a Mediterranean Diet. *N Engl J Med* 2013, 368:1279-1290.
