# Supplementary material for: Adherence to Mediterranean and low-fat diets among heart and lung transplant recipients: a randomized feasibility study
Source: PubMed Central journal article supplement (PMC5813407; doi:10.1186/s12937-018-0337-y), 2018-02-14
Supplement: 12937_2018_337_MOESM2_ESM.pdf [file 12937_2018_337_MOESM2_ESM.pdf]

**Supplemental Table 2: AMEND-IT 9-point low-fat diet adherence questionnaire<sup>1</sup>**

| Dietary habit/ consumption frequency                                                                                                                                                                           | Score |     |    |
|----------------------------------------------------------------------------------------------------------------------------------------------------------------------------------------------------------------|-------|-----|----|
|                                                                                                                                                                                                                | 2     | 1   | 0  |
| 1. On average, how many tablespoons of vegetable oil (e.g. sunflower, olive, sesame, rapeseed oil) do you consume in a given day for frying, salads & out of house meals etc.?                                 | 0–1   | 2–4 | ≥5 |
| 2. Do you remove visible fat (or skin) from chicken, duck, pork, lamb or beef before cooking; and the fat from soups, broths and cooked meat dishes before eating?                                             |       | Yes | No |
| 3. How many servings of non-lean meats, hamburger, commercial minced meat, sausage, cold meat, cured ham, bacon, salami or offal do you consume <u>per week</u> ? (meat serving = 100g or salami or bacon 30g) | 0–1   | 2–4 | ≥5 |
| 4. How many servings of butter, margarine, lard, mayonnaise, milk-cream or milk-based ice cream do you consume per week? (spread fat serving= 2g, ice cream= 100g)                                             | 0–1   | 2–4 | ≥5 |
| 5. Do you exclusively consume low-fat dairy products?                                                                                                                                                          |       | Yes | No |
| 6. How many times per week do you eat fried foods e.g. chips/French fries or fried chicken?                                                                                                                    | 0–1   | 2–4 | ≥5 |
| 7. How many times per week do you consume fatty fish or fish or seafood canned in oil?                                                                                                                         | 0–1   | 2–4 | ≥5 |
| 8. How many servings of commercial sweets or industrial bakery products (not homemade), such as cakes, cookies, biscuits or custard do you consume per week? (cake serving = 80g or 6 biscuits 40g)            | 0–1   | 2–4 | ≥5 |
| 9. How many times per week do you consume nuts (including peanuts), potato, corn or wheat crisps or commercial snacks?                                                                                         | 0–1   | 2–4 | ≥5 |

<sup>1</sup> Adapted from Estruch et al.

### Reference

1. Estruch R, Ros E, Salas-Salvadó J, Covas M-I, Corella D, Arós F, Gómez-Gracia E, Ruiz-Gutiérrez V, Fiol M, Lapetra J, et al: Primary Prevention of Cardiovascular Disease with a Mediterranean Diet. *N Engl J Med* 2013, 368:1279-1290.
